# Supplementary material for: Anti-SARS-CoV-2 Titers Predict the Severity of COVID-19
Source: MDPI journal article supplement (doi:10.3390/v14051089), 2022-05-18
Supplement: s1 [file s1]

# Supplementary Material

## Anti-SARS-CoV-2 Titers Predict the Severity of COVID-19

**A. Kritikos<sup>1,2^</sup>, S. Gabellon<sup>2^</sup>, JL. Pagani<sup>3</sup>, M. Monti<sup>4</sup>, PY. Bochud<sup>2</sup>, O. Manuel<sup>2</sup>, A. Coste<sup>1</sup>, G. Greub<sup>1,2</sup>, M. Perreau<sup>5</sup>, G. Pantaleo<sup>5</sup>, A. Croxatto<sup>1,6</sup>, F. Lamothe<sup>1,2</sup>**

<sup>1</sup> Institute of Microbiology, Lausanne University Hospital and University of Lausanne; antonios.kritikos@chuv.ch (AK); Alix.Coste@chuv.ch (ACO); Antony.Croxatto@ne.ch (AC); Gilbert.Greub@chuv.ch (GG); Frederic.Lamothe@chuv.ch (FL)

<sup>2</sup> Infectious Diseases Service, Lausanne University Hospital and University of Lausanne; sophie.gabellon@unil.ch (SG); Pierre-Yves.Bochud@chuv.ch (PYB), Oriol.Manuel@chuv.ch (OM)

<sup>3</sup> Intensive Care Unit, Lausanne University Hospital and University of Lausanne; Jean-Luc.Pagani@chuv.ch (JLP)

<sup>4</sup> Service of Internal Medicine, Lausanne University Hospital and University of Lausanne; Matteo.Monti@chuv.ch (MM)

<sup>5</sup> Service of Immunology and Allergy, Lausanne University Hospital and University of Lausanne; Matthieu.Perreau@chuv.ch (MP); Giuseppe.Pantaleo@chuv.ch (GP)

<sup>6</sup> ADMED Microbiology, La Chaux-de-Fonds, Switzerland

\* Correspondence: Antonios.kritikos@chuv.ch; Tel: +41-(0)-21-314-02-71

^ Equal contribution

Figure S1. Antibody titers stratified by duration of symptoms.

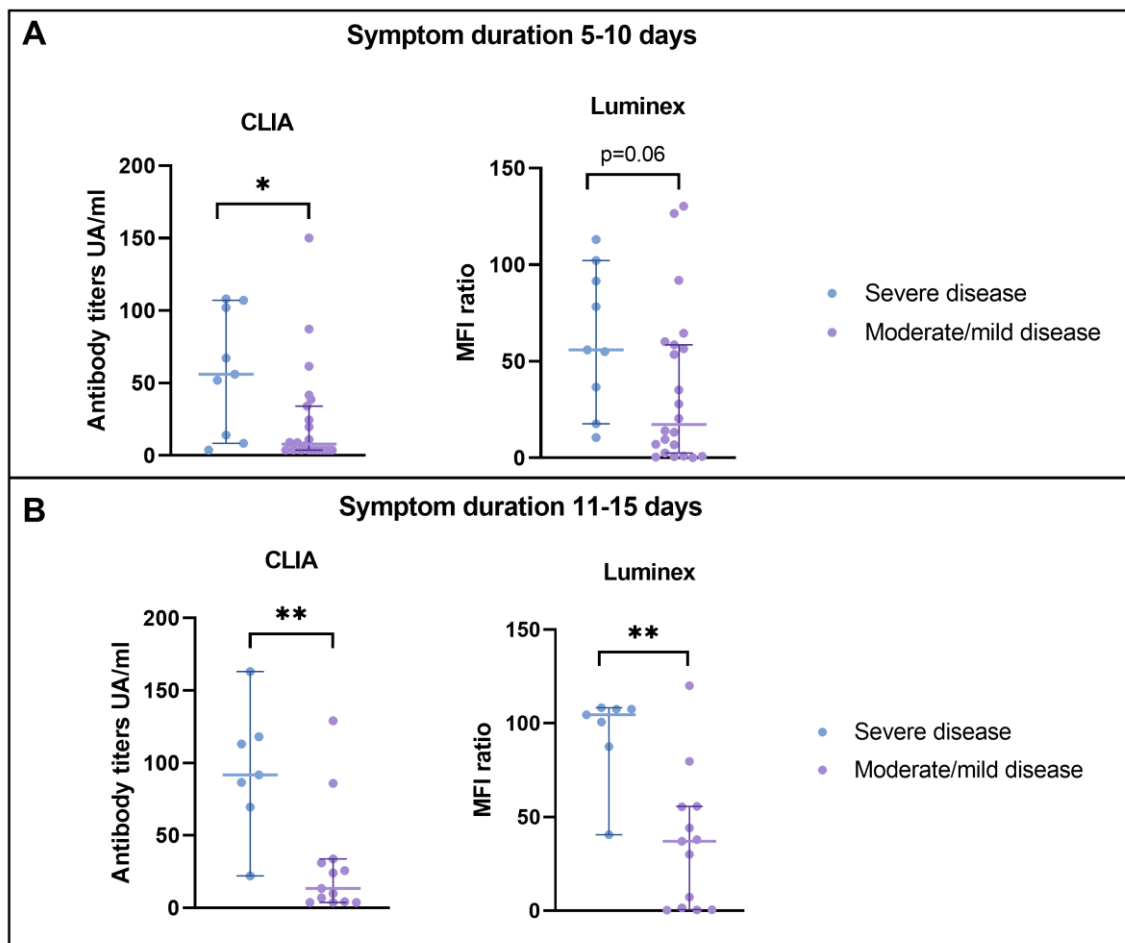

Scatter plot with lines at median and whiskers showing the 95% confidence interval (CI). **Panel A)** Symptom duration 5-10 days, **panel B)** symptom duration 11-15 days. (  $*$ = $p<0.05$ ,  $**$ = $p<0.01$ , MFI= Median fluorescence intensity).

**Table S1: Administered anti-SARS-CoV-2 treatment.**

| Characteristics, n (%)          | Total patients<br>(N = 70) | Severe disease | Moderate disease | Mild disease | p_value          |
|---------------------------------|----------------------------|----------------|------------------|--------------|------------------|
| Any anti-SARS-CoV-2 treatment   | 44 (63)                    | 22 (31)        | 20 (29)          | 2 (3)        | <b>&lt;0.001</b> |
| Protease inhibitor <sup>1</sup> | 14 (32)                    | 6 (27)         | 7 (35)           | 1 (50)       | 0.3              |
| Hydroxychloroquine              | 27 (61)                    | 12 (54)        | 13 (65)          | 2 (100)      | <b>0.01</b>      |
| Remdesivir                      | 8 (18)                     | 6 (27)         | 2 (10)           | 0            | <b>&lt;0.001</b> |
| Tocilizumab                     | 20 (45)                    | 15 (68)        | 5 (25)           | 0            | <b>&lt;0.01</b>  |
| Corticosteroid treatment        | 7 (16)                     | 5 (23)         | 2 (10)           | 0            | 0.1              |
| Interferon-based therapy        | 2 (4)                      | 0              | 2 (10)           | 0            | 0.9              |

<sup>1</sup> Lopinavir or atazanavir
